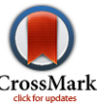

# The Noradrenaline Metabolite MHPG Is a Candidate Biomarker from the Manic to the Remission State in Bipolar Disorder I: A Clinical Naturalistic Study

Masatake Kurita<sup>1,2,3\*</sup>, Satoshi Nishino<sup>1,2</sup>, Yukio Numata<sup>1</sup>, Yoshiro Okubo<sup>3</sup>, Tadahiro Sato<sup>1</sup>

**1** Sato Hospital, Koutokukai, 948-1 Kunugizuka, Nanyo, Yamagata, Japan, **2** Department of Cellular Signaling, Graduate School of Pharmaceutical Sciences, Tohoku University, 6-3 Aoba, Aramaki, Aoba-ku, Sendai, Japan, **3** Department of Psychiatry and Behavioral Science, Graduate School of Medicine, Nippon Medical School, Bunkyo-ku, Tokyo, Japan

## Abstract

Remission is the primary goal of treatment for bipolar disorder I (BDI). Metabolites of noradrenaline and dopamine, 3-methoxy-4-hydroxyphenylglycol (MHPG) and homovanillic acid (HVA), respectively, are reduced by treatment with antipsychotics, but whether these phenomena are caused by antipsychotics or by the pathophysiology of BDI is not known. Interactions between brain-derived neurotrophic factor (BDNF) and mood disorders have also been suggested. We conducted a multifaceted study in BDI patients to ascertain if biological markers are associated with the manic state. Patients with Young Mania Rating Scale (YMRS) scores  $>20$  participated in the study. Final analyses involved 24 BDI patients (13 men and 11 women). We used YMRS scores to identify mania stages in individual BDI patients (i.e., manic syndrome, response and remission stages). Statistical analyses were done using one-way repeated-measures analyses of variance (rep-ANOVA) throughout manic syndrome, response and remission stages. Plasma concentrations of MHPG and HVA were analyzed by high-performance liquid chromatography with electrochemical detection. Plasma levels of BDNF were measured by sandwich enzyme-linked immunosorbent assay. BDI patients had significantly reduced plasma levels of MHPG throughout manic syndrome, response and remission stages (rep-ANOVA,  $p = 0.002$ ). Without a case of response state, there was a significant positive correlation between YMRS scores and plasma levels of MHPG ( $\rho = 0.33$ ,  $p = 0.033$ ,  $n = 48$ ). Plasma levels of HVA and BDNF were not significantly altered throughout manic syndrome, response and remission stages. These data suggest that the peripheral level of MHPG (which is associated with noradrenaline levels in the brain) could be used as a biomarker for the manic state in BDI. The MHPG level is likely to reflect the clinical characteristics of the manic syndrome in BDI, and noradrenaline may reflect the pathophysiology from manic to remission states.

**Citation:** Kurita M, Nishino S, Numata Y, Okubo Y, Sato T (2014) The Noradrenaline Metabolite MHPG Is a Candidate Biomarker from the Manic to the Remission State in Bipolar Disorder I: A Clinical Naturalistic Study. PLoS ONE 9(6): e100634. doi:10.1371/journal.pone.0100634

**Editor:** Chunyu Liu, University of Illinois at Chicago, United States of America

**Received:** November 27, 2013; **Accepted:** May 29, 2014; **Published:** June 27, 2014

**Copyright:** © 2014 Kurita et al. This is an open-access article distributed under the terms of the Creative Commons Attribution License, which permits unrestricted use, distribution, and reproduction in any medium, provided the original author and source are credited.

**Funding:** This study was supported by funding from Koutokukai, Sato Hospital. The study did not receive funding from any pharmaceutical corporations. The funders had no role in study design, data collection and analysis, decision to publish, or preparation of the manuscript.

**Competing Interests:** The authors have declared that no competing interests exist.

\* Email: kurita@koutoku.or.jp

## Introduction

Bipolar disorder I (BDI) is an episodic illness characterized by recurrent manic, mixed, and depressive episodes with an estimated global lifetime prevalence of 1–5% [1]. BDI is associated with a high prevalence of mortality and morbidity [2], functional impairment [3], and suicide [4]. Mania is a core aspect of the presentation of BDI, but the pathophysiology of manic syndrome is poorly understood. Recent evidence suggests that atypical antipsychotics are effective for the treatment of manic syndrome [5,6]. Moreover, it is known that levels of the metabolites of noradrenaline and dopamine, 3-methoxy-4-hydroxyphenylglycol (MHPG) and homovanillic acid (HVA), respectively, are higher in bipolar manic patients more than in normal control [7,8], are reduced by treatment with antipsychotic agents [8]. However, several reports have suggested that antipsychotics can induce depression or extrapyramidal symptoms (EPS) in bipolar manic patients [9,10,11]. Thus, whether the decreased levels of MHPG and HVA are caused by the carryover effect of antipsychotics or by the pathophysiology of BDI is not known.

Furthermore, a meta-analysis showed that brain-derived neurotrophic factor (BDNF) levels were decreased in bipolar mania and bipolar depression when compared with both control groups [12]. It is also not clear whether the decreased levels of BDNF are caused by the carryover effect of antipsychotics or by the pathophysiology of BDI. Thus, the association of BDI with peripheral biomarkers in the pathophysiology of BDI is not clear. Currently, there is no biomarker that could serve as an objective index for evaluating the severity of BDI or whether a particular treatment will be effective for BDI.

The main purpose of the present study was to ascertain if plasma levels of catecholamine metabolites and BDNF are correlated with the severity of manic symptoms in BDI, and to understand the pathophysiology of BDI. We focused on the correlation of biomarkers and symptoms, not the effects of medication upon biomarkers. Our report is the first naturalistic, retrospective study examining levels of MHPG (a noradrenaline metabolite associated with noradrenaline levels in the brain), HVA (a dopamine metabolite associated with dopamine levels in the brain) and BDNF in manic states of BDI.

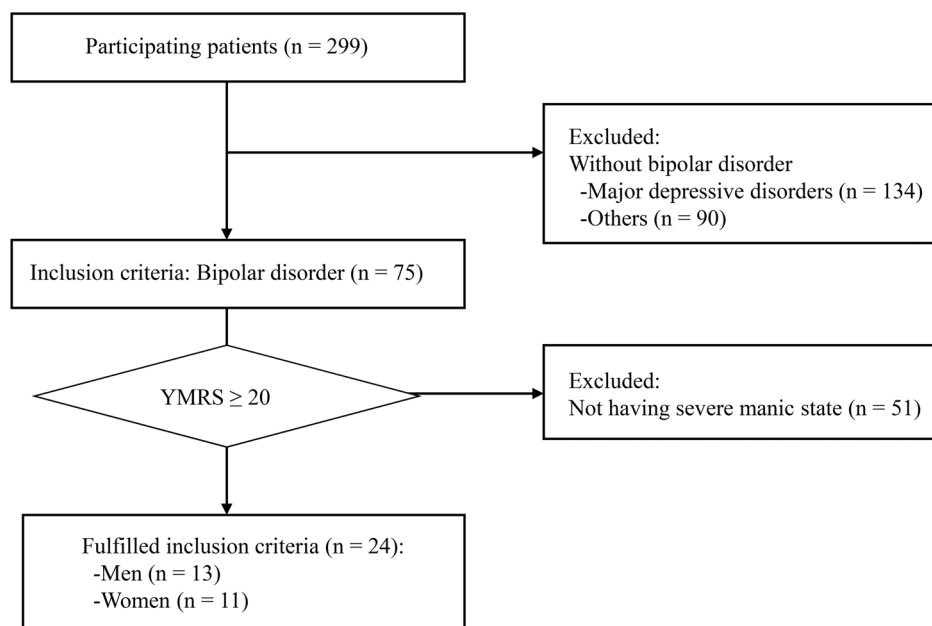

**Figure 1. Flowchart of patient numbers through the study.**  
doi:10.1371/journal.pone.0100634.g001

## Methods

### Subjects

A detailed flowchart of patient selection is shown in Fig. 1. Subjects were recruited from BPI patients admitted to the inpatient and outpatient clinics of Sato Hospital (Koutokukai, Japan) between June 2006 and August 2010. All patients were suffering from a manic episode according to the diagnosis of BDI stated in the *Diagnostic and Statistical Manual for Mental Disorders* (fourth edition, text version, DSM-IV-TR, American Psychiatric Association, 2000). Subjects with any other diagnosed mental or severe physical illness were excluded from the study. Patients were also excluded if they exhibited a borderline personality disorder, antisocial personality disorder, or if they had a history of substance dependence.

After the procedures had been explained fully to them, participants provided written informed consent. Study protocols were approved by the Ethics Committee of Sato Hospital and the Ethics Committee of the Graduate School of Pharmaceutical Sciences of Tohoku University (Sendai, Japan). Standard procedures for clinical trials involving vulnerable participants in Japan were followed. This study was undertaken according to the ethical standards set in the Declaration of Helsinki. Patients who declined to participate or who otherwise did not take part remained eligible for treatment, and were not disadvantaged in any way by not participating in the study.

As a criterion for patient inclusion, we chose a Young Mania Rating Scale (YMRS) score of  $\geq 20$  points as the manic syndrome stage [13]. In addition, patients were considered to be in remission if they scored  $\leq 8$  on the Montgomery-Åsberg Depression Rating Scale (MADRS) [14] and YMRS [15,16]. The response stage was defined as a reduction of  $< 50\%$  in YMRS score from the manic syndrome stage. The final analyses comprised 24 BDI patients (13 men and 11 women; average age,  $54.5 \pm 16.0$  (range, 24–79) years).

None of the subjects were taking hormone therapies (including oral contraceptives). Dosage and administration of antihyperten-

sive medications were unchanged during this study. The following antihypertensive medications were administered during this study: amlodipine (5 mg/day;  $n = 2$ ), lisinopril (20 mg/day;  $n = 1$ ) and nifedipine (20 mg/day;  $n = 1$ ). One patient was administered acetaminophen (450 mg/day;  $n = 1$ ) temporarily during the responder state. Most patients (22/24) had been prescribed mood stabilizers and/or antipsychotic drugs by psychiatrists. Psychiatrists treated patients with brief sessions of psychotherapy. The following mood stabilizers and antipsychotic drugs were administered in the manic syndrome stage: lithium (200–800 mg/day;  $n = 8$ ), valproic acid (400–1600 mg/day;  $n = 16$ ), lamotrigine (100 mg/day;  $n = 1$ ), carbamazepine (400 mg/day;  $n = 1$ ), risperidone (1.5–4 mg/day;  $n = 4$ ), quetiapine (50–200 mg/day;  $n = 2$ ), chlorpromazine (12.5–150 mg/day;  $n = 3$ ), propericiazine (10–30 mg/day;  $n = 2$ ), levomepromazine (5–50 mg/day;  $n = 6$ ), zotepine (150 mg/day;  $n = 1$ ) and aripiprazole (18 mg/day;  $n = 1$ ). The mean dose at the syndrome stage for chlorpromazine equivalence [17] was  $116 \pm 145$  mg/day. Eight patients were not taking antipsychotics at the syndrome stage. The following mood stabilizers and antipsychotic drugs were administered in the response stage: lithium (300–800 mg/day;  $n = 8$ ), valproic acid (200–2000 mg/day;  $n = 17$ ), lamotrigine (100 mg/day;  $n = 1$ ), carbamazepine (400 mg/day;  $n = 2$ ), risperidone (1.5–16 mg/day;  $n = 3$ ), quetiapine (50–600 mg/day;  $n = 2$ ), chlorpromazine (37.5 mg/day;  $n = 1$ ), propericiazine (15 mg/day;  $n = 1$ ), levomepromazine (5–150 mg/day;  $n = 6$ ), zotepine (50–400 mg/day;  $n = 2$ ), aripiprazole (12 mg/day;  $n = 1$ ), blonanserin (4 mg/day;  $n = 1$ ) and sultopride (300 mg/day;  $n = 1$ ). The mean dose at the response stage for chlorpromazine equivalence was  $187 \pm 473$  mg/day. Eleven patients were not taking antipsychotics at the response stage. The following mood stabilizers and antipsychotic drugs were administered in the remission stage: lithium (300–800 mg/day;  $n = 9$ ), valproic acid (200–2000 mg/day;  $n = 18$ ), lamotrigine (100 mg/day;  $n = 1$ ), carbamazepine (400 mg/day;  $n = 1$ ), risperidone (0.5–16 mg/day;  $n = 3$ ), quetiapine (50 mg/day;  $n = 1$ ), propericiazine (10 mg/day;  $n = 1$ ), levomepromazine (5–80 mg/day;  $n = 5$ ), zotepine (50–400 mg/day;  $n = 2$ ), aripiprazole

**Table 1.** Medications taken by study patients.

|         | <b>Syndrome</b> | <b>(mg)</b> | <b>Response</b> | <b>(mg)</b> | <b>Remission</b> | <b>(mg)</b> |
|---------|-----------------|-------------|-----------------|-------------|------------------|-------------|
| Case 1  | -               |             | -               |             | -                |             |
| Case 2  | lithium         | 200         | valproic acid   | 200         | valproic acid    | 200         |
|         | valproic acid   | 600         |                 |             |                  |             |
|         | risperidone     | 4           |                 |             |                  |             |
| Case 3  | lithium         | 800         | lithium         | 800         | lithium          | 800         |
|         | valproic acid   | 800         | valproic acid   | 1200        | valproic acid    | 1200        |
|         | levomepromazine | 50          | levomepromazine | 50          | levomepromazine  | 50          |
| Case 4  | -               |             | -               |             | -                |             |
| Case 5  | valproic acid   | 1200        | lithium         | 600         | lithium          | 600         |
|         | chlorpromazine  | 150         | valproic acid   | 1200        | valproic acid    | 1200        |
|         |                 |             | aripiprazole    | 12          | aripiprazole     | 12          |
| Case 6  | lithium         | 800         | lithium         | 800         | lithium          | 800         |
|         | chlorpromazine  | 37.5        | chlorpromazine  | 37.5        | chlorpromazine   | 10          |
|         | levomepromazine | 10          | levomepromazine | 10          |                  |             |
| Case 7  | lithium         | 300         | carbamazepine   | 400         | valproic acid    | 400         |
|         | aripiprazole    | 18          |                 |             |                  |             |
| Case 8  | lithium         | 500         | lithium         | 600         | lithium          | 600         |
|         | valproic acid   | 600         | valproic acid   | 800         | valproic acid    | 800         |
|         | risperidone     | 1.5         | risperidone     | 1.5         | risperidone      | 2           |
| Case 9  | valproic acid   | 1000        | valproic acid   | 1600        | valproic acid    | 1600        |
| Case 10 | lithium         | 600         | lithium         | 400         | lithium          | 400         |
|         | valproic acid   | 600         | valproic acid   | 600         | valproic acid    | 600         |
|         | propericiazine  | 30          | propericiazine  | 15          | propericiazine   | 10          |
|         | levomepromazine | 50          | sultopride      | 300         | sultopride       | 100         |
|         |                 |             | levomepromazine | 150         | levomepromazine  | 75          |
| Case 11 | lithium         | 400         | lithium         | 400         | lithium          | 400         |
|         | valproic acid   | 800         | valproic acid   | 400         | valproic acid    | 400         |
|         | propericiazine  | 10          | levomepromazine | 10          |                  |             |
|         | levomepromazine | 25          |                 |             |                  |             |
| Case 12 | valproic acid   | 1600        | valproic acid   | 2000        | valproic acid    | 2000        |
|         | quetiapine      | 200         | quetiapine      | 600         |                  |             |
| Case 13 | lamotrigine     | 100         | lamotrigine     | 100         | lamotrigine      | 100         |
|         | quetiapine      | 50          | quetiapine      | 50          | quetiapine       | 50          |
| Case 14 | valproic acid   | 1200        | valproic acid   | 800         | valproic acid    | 800         |
| Case 15 | lithium         | 800         | lithium         | 400         | lithium          | 400         |
|         | valproic acid   | 1000        | valproic acid   | 1000        | valproic acid    | 1000        |
|         | chlorpromazine  | 12.5        |                 |             |                  |             |
| Case 16 | -               |             | valproic acid   | 1000        | valproic acid    | 1200        |
| Case 17 | carbamazepine   | 400         | carbamazepine   | 400         | carbamazepine    | 400         |
|         | levomepromazine | 35          | levomepromazine | 80          | lithium          | 600         |
|         |                 |             |                 |             | levomepromazine  | 80          |
| Case 18 | valproic acid   | 1400        | valproic acid   | 1000        | valproic acid    | 1000        |
| Case 19 | valproic acid   | 1200        | valproic acid   | 1500        | valproic acid    | 1400        |
| Case 20 | valproic acid   | 1000        | valproic acid   | 1200        | valproic acid    | 1200        |
|         | levomepromazine | 5           | blonanserin     | 4           | levomepromazine  | 5           |
|         |                 |             | levomepromazine | 5           |                  |             |
| Case 21 | risperidone     | 2           | risperidone     | 1           | risperidone      | 0.5         |
| Case 22 | valproic acid   | 900         | valproic acid   | 900         | valproic acid    | 900         |
| Case 23 | valproic acid   | 1100        | lithium         | 300         | lithium          | 300         |
|         | zotepine        | 150         | valproic acid   | 1200        | valproic acid    | 1200        |

Table 1. Cont.

|         | Syndrome      | (mg) | Response      | (mg) | Remission     | (mg) |
|---------|---------------|------|---------------|------|---------------|------|
|         |               |      | zotepine      | 50   | zotepine      | 50   |
| Case 24 | valproic acid | 400  | valproic acid | 1600 | valproic acid | 1600 |
|         | risperidone   | 4    | risperidone   | 16   | risperidone   | 16   |
|         |               |      | zotepine      | 400  | zotepine      | 400  |

doi:10.1371/journal.pone.0100634.t001

(12 mg/day;  $n = 1$ ) and sultopride (100 mg/day;  $n = 1$ ). The mean dose at the remission stage for chlorpromazine equivalence was  $134 \pm 448$  mg/day. Thirteen patients were not taking antipsychotics at the remission stage (Table 1).

### Assessment

The clinical status of patients was evaluated using the YMRS [15] and MADRS [14]. Symptom severity was assessed every two weeks by independent experienced raters using the YMRS and MADRS. Raters were blinded to the treatment the participants had been receiving and were not associated with treatment administration.

### Sample Collection

Blood sampling and mood assessments were carried out at the same time of day every two weeks. Blood was drawn from each subject by venipuncture into a blood-collection tube containing the anticoagulant ethylenediamine tetra-acetic acid between 10:00 and 17:00. Tubes were cooled immediately to  $4^{\circ}\text{C}$  and then centrifuged at  $2000 \times g$  for 20 min. Plasma was kept at  $-80^{\circ}\text{C}$  until assay.

### Laboratory Assays

Plasma levels of MHPG and HVA were analyzed by high-performance liquid chromatography with electrochemical detection [18,19] using internal-standard (5-hydroxyindolecarboxylic acid) and standard-addition methods. Plasma levels of BDNF were analyzed by sandwich enzyme-linked immunosorbent assay as described previously [20].

### Data Analyses

Statistical analyses of MADRS and YMRS scores and plasma levels of MHPG, HVA and BDNF were undertaken using one-way repeated-measures analyses of variance (rep-ANOVA) for the three stages of symptoms. *Post hoc* tests were carried out on rep-ANOVA results using the Bonferroni correction for multiple comparisons. Data are the means  $\pm$  standard deviation (mean  $\pm$  SD). Correlation analyses were done using Spearman's correlation ( $\rho$ ).  $p < 0.05$  was considered significant. Testing for normal distribution of data was undertaken using Mauchly's sphericity test. Analyses were carried out using SPSS v16.0 (SPSS, Chicago, IL, USA).

### Trial Registration

This study is registered in the UMIN Clinical Trials Registry (UMIN-C'TR): Analysis of genome and blood components for elucidation and treatment of mood disorders (<https://upload.umin.ac.jp/cgi-open-bin/ctr/ctr.cgi?function=brows&action=brows&rcptno=R000007415&type=summary&language=E>; UMIN000006264).

## Results

### Assessment

We used the YMRS score to separate stages (i.e., manic syndrome, response, remission). The manic syndrome stage was defined as a YMRS of  $\geq 20$  points [13]. The response stage was defined as a reduction in the YMRS score of  $< 50\%$  from the manic syndrome stage. The remission stage was defined as a YMRS score  $\leq 8$  [15,16]. Mean YMRS scores for manic syndrome, response, and remission stages were  $32.5 \pm 8.3$ ,  $6.4 \pm 5.9$ , and  $1.9 \pm 2.7$ , respectively. Consequently, patients in the remission group had significantly reduced YMRS scores during treatment (repeated-measures ANOVA;  $F_{2,46} = 224.823$ ,  $p < 0.001$ ). There were significant differences in YMRS scores among stages (manic syndrome *vs* response ( $p < 0.001$ ), manic syndrome *vs* remission ( $p < 0.001$ ), and response *vs* remission ( $p = 0.007$ ); Bonferroni's multiple comparison). Patients exhibited no significant changes in MADRS score among manic syndrome, response and remission stages ( $0.7 \pm 1.5$ ,  $1.5 \pm 2.4$ , and  $1.7 \pm 2.3$ , respectively) (repeated-measures ANOVA;  $F_{2,46} = 2.310$ ,  $p = 0.111$ ). The period from the manic syndrome stage to the response stage was  $3.4 \pm 2.4$  weeks. The period from the manic syndrome stage to the remission stage was  $5.8 \pm 3.2$  weeks (Table 2).

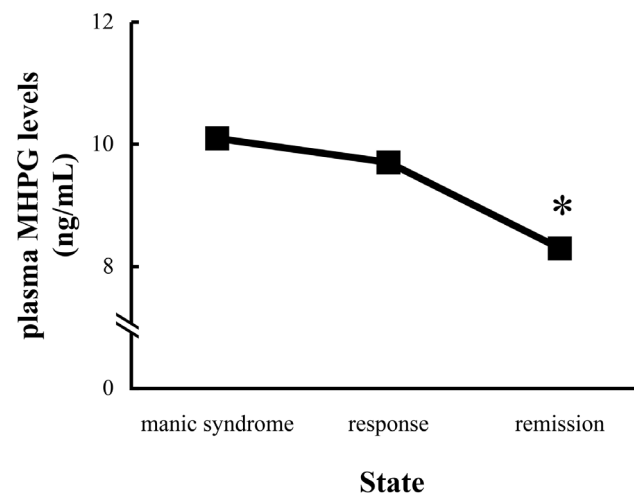

**Figure 2. Changes in plasma levels of MHPG in the manic state for BDI patients.** Each point represents the mean value. The significance of differences was calculated using repeated-measures ANOVA with *post hoc* Bonferroni testing ( $*p < 0.05$ ). Patients had significantly reduced plasma levels of MHPG throughout the manic syndrome, response and remission stages (repeated-measures ANOVA;  $F_{2,46} = 7.370$ ,  $p = 0.002$ ). doi:10.1371/journal.pone.0100634.g002

**Table 2.** Mean changes in outcome measures.

|                                  | Syndrome     | Response     | Remission    | <i>p</i> |     |
|----------------------------------|--------------|--------------|--------------|----------|-----|
| Period from the syndrome (weeks) |              | 3.4 (2.4)    | 5.8 (3.2)    |          |     |
| Assessments                      |              |              |              |          |     |
| <b>YMRS</b> (points)             | 32.5 (8.3)   | 6.4 (5.9)    | 1.9 (2.7)    | <0.001   | *** |
| <b>MADRS</b> (points)            | 0.7 (1.5)    | 1.5 (2.4)    | 1.7 (2.3)    | 0.111    |     |
| Biological markers               |              |              |              |          |     |
| <b>MHPG</b> (ng/mL)              | 10.14 (2.85) | 9.70 (2.93)  | 8.33 (2.20)  | 0.002    | **  |
| <b>HVA</b> (ng/mL)               | 11.54 (4.36) | 11.72 (7.65) | 10.02 (4.44) | 0.273    |     |
| <b>BDNF</b> (pg/mL)              | 5493 (4905)  | 6611 (4822)  | 6619 (4709)  | 0.293    |     |

Values are the mean (SD).

Statistical analyses were carried out using one-way repeated measures analysis of variance.

Statistically significant (\*\* $p < 0.01$ , \*\*\* $p < 0.001$ ).

YMRS, Young Mania Rating Scale; MADRS, Montgomery-Åsberg Depression Rating Scale; MHPG, 3-methoxy-4-hydroxyphenylglycol; HVA, homovanillic acid;

BDNF, brain-derived neurotrophic factor.

doi:10.1371/journal.pone.0100634.t002

## Biological Markers

Plasma levels of MHPG in manic syndrome, response and remission stages were  $10.1 \pm 2.9$ ,  $9.7 \pm 2.9$ , and  $8.3 \pm 2.2$  ng/mL, respectively. Patients had significantly reduced plasma levels of MHPG throughout the manic syndrome, response and remission stages (repeated-measures ANOVA;  $F_{2,46} = 7.370$ ,  $p = 0.002$ ) (Fig. 2). There were significant differences in plasma levels of MHPG among stages (manic syndrome *vs* response ( $p = 0.871$ ), manic syndrome *vs* remission ( $p = 0.006$ ), and response *vs* remission ( $p = 0.054$ ); Bonferroni's multiple comparison).

Treatment of BDI led to an expected decrease in YMRS scores, and this was accompanied by a significant decrease in plasma levels of MHPG. A trend for positive correlation was found between YMRS scores and plasma levels of MHPG throughout the manic syndrome, response and remission stages ( $\rho = 0.214$ ,  $p = 0.071$ ,  $n = 72$ ). In the case of taking into account only the manic syndrome and remission stages, there was a significant positive correlation between YMRS scores and plasma levels of MHPG ( $\rho = 0.33$ ,  $p = 0.033$ ,  $n = 48$ ). In contrast, patients exhibited no significant changes in plasma levels of HVA or BDNF throughout the manic syndrome, response and remission stages (repeated-measures ANOVA;  $F_{2,46} = 1.334$ ,  $p = 0.273$ ;  $F_{2,46} = 1.261$ ,  $p = 0.293$ ). No significant correlation was found between plasma levels of HVA or BDNF and the manic state (Table 2).

## Discussion

In the present study, we focused on the pathophysiology of BDI. An advantage of our naturalistic study was that we could compare the multifaceted biomarkers between manic states. Antipsychotics [21] and mood stabilizers [22] have good efficacy in controlling manic syndrome in BDI patients.

Several reports have suggested that the BDNF system might change individual susceptibility to BDI [12,23]. Also, some studies have shown levels of MHPG and HVA to be decreased after antipsychotic treatments in BDI patients [8] and psychotic patients [24]. Thus, the association between BDI and peripheral biomarkers is not consistent with respect to the pathophysiology of BDI.

For the first time in the literature, patients in the manic state of BDI underwent evaluation of levels of MHPG, HVA and BDNF in a naturalistic study. Interestingly, BDI patients had significantly reduced plasma levels of MHPG throughout manic syndrome,

response and remission stages. Conversely, no significant changes were observed between plasma levels of HVA or BDNF (Table 2). In the case of taking into account only the manic syndrome and remission stages, we found a significant positive correlation between YMRS scores and plasma levels of MHPG. However, only a trend for positive correlation was found between YMRS scores and plasma levels of MHPG within the three states. BDI patients had significantly reduced plasma levels of MHPG throughout the three states, but the response state may be dependent upon the individual. These results suggest that the plasma level of MHPG acted as a peripheral biomarker, consistently indicating the synchronized progression of symptoms from the manic state to the remission state in BDI. MHPG is the major metabolite of noradrenaline in the brain [25]. In the present study, only the plasma level of MHPG exhibited significant changes that correlated with the YMRS score among stages. The results of the present study suggest that changes in the noradrenergic system are more likely than changes in the dopaminergic and BDNF systems to improve manic syndrome in BDI.

Antipsychotics can induce depression or EPS in bipolar manic patients [9,10,11]. Hence, antipsychotics are a temporary treatment in severe manic cases, and clinicians know that there is an increased risk of depression or EPS if high doses of antipsychotics are continued to be prescribed. In the present study, the mean dose at remission for chlorpromazine equivalence [17] was  $134 \pm 448$  mg/day. In studies involving decreased levels of MHPG and HVA, the mean doses for chlorpromazine equivalence [17] were  $380 \pm 110$  and 300–600 (for a 60-kg body weight) mg/day, respectively [8,24]. Further studies are needed to ascertain if decreased levels of MHPG and HVA are due to the carryover effects of antipsychotics. With respect to chlorpromazine equivalence, this study suggests that the effects of antipsychotics are slight. In addition, of the 24 patients in the present study, the number of subjects not taking antipsychotics increased from 8 patients in the syndrome stage to 13 patients in the remission stage. In summary, the result of decreased plasma levels of MHPG may reflect the pathophysiology from manic to remission states.

This study had limitations. One was the lack of a control group with placebo treatments. However, even though most treatments involved mood stabilizers in the remission state, plasma levels of MHPG continued to decline. Blood was drawn from individual patients in the same time zone as much as possible, but could not

be withdrawn from all patients in the same time zone. Plasma levels of MHPG do not change a great deal within the active phase [26]. On the other hand, phase advance in diurnal MHPG rhythm reported in depression [27]. Conversely, diurnal variation in plasma levels of BDNF may be associated with differences between the sexes [28,29]. The half-life in the human brain is 88.4 h for olanzapine and 45.5 h for risperidone [30], so the carryover effects of antipsychotics may not have occurred in the present study. More large-scale design follow-up studies are needed to understand the pathologic state for the treatment of BDI.

## Conclusions

These data suggest that the peripheral level of MHPG (which is associated with noradrenaline levels in the brain) could be used as a biomarker for manic states in BDI. The MHPG level is likely to reflect the severity of the manic state in BDI, and noradrenaline may reflect the pathophysiology from manic to remission states. The MHPG level could be markedly different from individual to

individual. Therefore, it is important that the MHPG level of an individual patient is known because it may change over time.

## Acknowledgments

We thank the study participants, without whom this study could not have been accomplished, as well as the following psychiatrists of Sato Hospital and Wakamiya Hospital, Koutokukai, for their participation in this study: Kazuo Kenmi, M.D., Ph.D.; Asao Hasegawa, M.D.; Masaaki Mitomo, M.D. Tomotaka Suzuki, M.D.; Yukihiro Takeuchi, M.D., Ph.D.; Hiroshi Yamamoto, M.D.; Maiko Kato, M.D.; Kenji Takeyoshi, M.D.; and Kohei Koizumi, M.D. A part of data from this study were presented at the 18th meeting of the Japanese Association for Emergency Psychiatry, Osaka, Japan, October 14–15, 2010.

## Author Contributions

Conceived and designed the experiments: MK. Performed the experiments: MK SN YN TS. Analyzed the data: MK SN. Contributed reagents/materials/analysis tools: MK SN YN YO TS. Wrote the paper: MK SN.

## References

- Kastrup MC, Ramos AB (2007) Global mental health. *Dan Med Bull* 54: 42–43.
- Rush AJ (2003) Toward an understanding of bipolar disorder and its origin. *J Clin Psychiatry* 64 Suppl 6: 4–8; discussion 28.
- Rosa AR, Franco C, Martinez-Aran A, Sanchez-Moreno J, Reinares M, et al. (2008) Functional impairment in patients with remitted bipolar disorder. *Psychother Psychosom* 77: 390–392.
- Association AP (2002) Practice guideline for the treatment of patients with bipolar disorder (revision). *Am J Psychiatry* 159: 1–50.
- Vieta E, Goikolea JM (2005) Atypical antipsychotics: newer options for mania and maintenance therapy. *Bipolar Disord* 7 Suppl 4: 21–33.
- Yatham LN, Kennedy SH, Schaffer A, Parikh SV, Beaulieu S, et al. (2009) Canadian Network for Mood and Anxiety Treatments (CANMAT) and International Society for Bipolar Disorders (ISBD) collaborative update of CANMAT guidelines for the management of patients with bipolar disorder: update 2009. *Bipolar Disord* 11: 225–255.
- Azorin JM, Papeschi G, Valli M, Joanny P, Raucoules D, et al. (1990) Plasma 3-methoxy-4-hydroxyphenylglycol in manic patients: relationships with clinical variables. *Acta Psychiatr Scand* 81: 14–18.
- Yoshimura R, Nakano Y, Hori H, Ikenouchi A, Ueda N, et al. (2006) Effect of risperidone on plasma catecholamine metabolites and brain-derived neurotrophic factor in patients with bipolar disorders. *Hum Psychopharmacol* 21: 433–438.
- Tohen M, Sanger TM, McElroy SL, Tollefson GD, Chengappa KN, et al. (1999) Olanzapine versus placebo in the treatment of acute mania. Olanzapine HGEH Study Group. *Am J Psychiatry* 156: 702–709.
- White E, Cheung P, Silverstone T (1993) Depot antipsychotics in bipolar affective disorder. *Int Clin Psychopharmacol* 8: 119–122.
- Kukopulos A, Reginaldi D, Laddomada P, Floris G, Serra G, et al. (1980) Course of the manic-depressive cycle and changes caused by treatment. *Pharmakopsychiatr Neuropsychopharmacol* 13: 156–167.
- Fernandes BS, Gama CS, Cereser KM, Yatham LN, Fries GR, et al. (2011) Brain-derived neurotrophic factor as a state-marker of mood episodes in bipolar disorders: a systematic review and meta-regression analysis. *J Psychiatr Res* 45: 995–1004.
- Calabrese JR, Shelton MD, Rapport DJ, Youngstrom EA, Jackson K, et al. (2005) A 20-month, double-blind, maintenance trial of lithium versus divalproex in rapid-cycling bipolar disorder. *Am J Psychiatry* 162: 2152–2161.
- Montgomery SA, Asberg M (1979) A new depression scale designed to be sensitive to change. *Br J Psychiatry* 134: 382–389.
- Young RC, Biggs JT, Ziegler VE, Meyer DA (1978) A rating scale for mania: reliability, validity and sensitivity. *Br J Psychiatry* 133: 429–435.
- Monteleone P, Serritella C, Martiadis V, Maj M (2008) Decreased levels of serum brain-derived neurotrophic factor in both depressed and euthymic patients with unipolar depression and in euthymic patients with bipolar I and II disorders. *Bipolar Disord* 10: 95–100.
- Andreassen NC, Pressler M, Nopoulos P, Miller D, Ho BC (2010) Antipsychotic dose equivalents and dose-years: a standardized method for comparing exposure to different drugs. *Biol Psychiatry* 67: 255–262.
- Yeung PK, Buckley SJ, Pedder SC, Dingemans J (1996) Determination of 3,4-dihydroxyphenylacetic acid and 5-hydroxyindoleacetic acid in human plasma by a simple and rapid high-performance liquid chromatography assay. *J Pharm Sci* 85: 451–453.
- Yoshimura R, Nakamura J, Shinkai K, Goto M, Yamada Y, et al. (2005) An open study of risperidone liquid in the acute phase of schizophrenia. *Hum Psychopharmacol* 20: 243–248.
- Kurita M, Nishino S, Kato M, Numata Y, Sato T (2012) Plasma brain-derived neurotrophic factor levels predict the clinical outcome of depression treatment in a naturalistic study. *PLoS One* 7: e39212.
- Yildiz A, Vieta E, Leucht S, Baldessarini RJ (2011) Efficacy of antimanic treatments: meta-analysis of randomized, controlled trials. *Neuropsychopharmacology* 36: 375–389.
- Macritchie K, Geddes JR, Scott J, Haslam D, de Lima M, et al. (2003) Valproate for acute mood episodes in bipolar disorder. *Cochrane Database Syst Rev*: CD004052.
- Kapczinski F, Dal-Pizzol F, Teixeira AL, Magalhaes PV, Kauer-Sant'Anna M, et al. (2011) Peripheral biomarkers and illness activity in bipolar disorder. *J Psychiatr Res* 45: 156–161.
- Bowers MB, Jr., Swigar ME, Jatlow PI, Hoffman EJ (1989) Plasma catecholamine metabolites and treatment response at neuroleptic steady state. *Biol Psychiatry* 25: 734–738.
- Schanberg SM, Breese GR, Schildkraut KK, Gordon EK, Kopin IJ (1968) 3-methoxy-4-hydroxyphenylglycol sulfate in brain and cerebrospinal fluid. *Biochem Pharmacol* 17: 2006–2008.
- Koenigsberg HW, Teicher MH, Mitropoulou V, Navalta C, New AS, et al. (2004) 24-h Monitoring of plasma norepinephrine, MHPG, cortisol, growth hormone and prolactin in depression. *J Psychiatr Res* 38: 503–511.
- Gwirtsman HE, Halaris AE, Wolf AW, DeMet E, Piletz JE, et al. (1989) Apparent phase advance in diurnal MHPG rhythm in depression. *Am J Psychiatry* 146: 1427–1433.
- Choi SW, Bhang S, Ahn JH (2011) Diurnal variation and gender differences of plasma brain-derived neurotrophic factor in healthy human subjects. *Psychiatry Res* 186: 427–430.
- Piccinni A, Marazziti D, Del Debbio A, Bianchi C, Roncaglia I, et al. (2008) Diurnal variation of plasma brain-derived neurotrophic factor (BDNF) in humans: an analysis of sex differences. *Chronobiol Int* 25: 819–826.
- Tauscher J, Jones C, Remington G, Zipursky RB, Kapur S (2002) Significant dissociation of brain and plasma kinetics with antipsychotics. *Mol Psychiatry* 7: 317–321.
